25 **Abstract**

26 **Objectives:** The purpose of this literature review was to clarify the sufficiency and efficiency  
27 needs, as well as the stratification and the assignment scoring principles of the International  
28 Classification of Functioning, Disability and Health (ICF) core set, in conjunction with the Item  
29 Response Theory (IRT)-derived functioning outcome measures.

30 **Methods:** A literature search has been done on the PubMed database. We included studies  
31 involving the IRT-derived ICF evaluation tool. Our main outcome was the assignment and  
32 stratification scoring principle of IRT-derived ICF-based functioning outcome measures.

33 **Results:** 46 relative articles met the eligibility criteria of our review. On this basis, this review  
34 was undertaken to track the research progress of the ICF-based and IRT-modeling measurement  
35 tools and screen the final core set. This review included a classification of IRT modeling for ICF  
36 studies and a summary of existing research paradigms of IRT-derived ICF outcome measures.  
37 Moreover, this review identified blind spots related to scoring assignment principles and  
38 “difficulty parameter” in current ICF-based IRT studies.

39 **Conclusion:** The ICF is the worldwide terminology system for functioning categories, while  
40 ICF-based evaluation in clinical practice and scientific research has elicited the underlying  
41 challenges. However, the algorithm of the ICF-based IRT modeling may advance the  
42 understanding of ICF clinical application and enable a new paradigm for the design of IRT-  
43 derived ICF questionnaires, namely the parsimonious core set of ICF. Additionally, the Wright  
44 map has the potential to facilitate an understanding of the rehabilitation process and tailor  
45 rehabilitation goals.

46 **Keywords:** Item Response Theory (IRT), International Classification of Functioning, Disability  
47 and Health (ICF), Wright map, Research paradigm

## 48 **Introduction**

49       Rehabilitation science is a discipline dedicated to comprehending and facilitating human  
50 functioning. In order to guide and inform clinical decisions, it is crucial to identify potential  
51 disabilities and monitor changes in functioning across the continuum of care. However,  
52 inconsistent and numerous outcome measure scales pose a major challenge to multidisciplinary  
53 communication. Additionally, determining the most appropriate functioning assessment scale  
54 presents several challenges. Firstly, it is inevitable to encounter a trade-off between the  
55 sufficiency and efficiency of assessment tools. Relying solely on disease-specific scales may fail  
56 to provide a comprehensive functioning assessment for patients with multiple health issues. A  
57 thorough assessment can provide valuable insights into rehabilitation management and functional  
58 recovery, while efficient clinical assessment tools that can rapidly and conveniently achieve  
59 outcome measures(Rolstad, Adler, and Rydén, 2011). The ideal functioning assessment should  
60 consider the length and complexity of assessment tools limited to a certain extent, so as to  
61 minimize the response burden on frail patients and optimize resource efficiency. Another concern  
62 is that many rehabilitation assessment scales, such as manual muscle testing, Barthel index, etc.  
63 use ordinal scales, that may not precisely capture the full range of functioning changes over time.

64       To tackle these barriers, the World Health Organization has introduced the International  
65 Classification of Functioning, Disability and Health (ICF), which offers a standardized  
66 international terminology for defining and operationalizing function management across multiple  
67 domains. Accurate and timely assessment of an individual's function is crucial in making clinical  
68 decisions for treatment planning and rehabilitation(Finch, Higgins, Wood-Dauphinee, and Mayo,  
69 2009). To achieve this, the assessment scale must include items that have high discrimination,  
70 enabling the determination of functioning performance. The Item Response Theory (IRT) is a  
71 well-established psychometric paradigm that measures the interaction between examinees and  
72 test items to estimate an individual's ability level (represented by the latent trait,  $\theta$ ). Additionally,  
73 the IRT model is a statistical technique that can provide theoretical and algorithmic support for  
74 the developing clinical assessment tools in healthcare practice(Stucki, Rubinelli, and Bickenbach,  
75 2020), which can transform raw ICF scores into the IRT-based interval scores. Recently,  
76 emerging studies have advocated the use of IRT-based Rasch models to process ICF evaluation  
77 data and generate the new version of the ICF core set that contains the most discriminable and  
78 minimal items.

79 This review aims to offer an overview of the research paradigm regarding the ICF-based  
80 functioning evaluation in combination with the IRT technique tools. Incorporating these two  
81 techniques, a comprehensive and continuous assessment of human functioning with a minimal  
82 core set can be constructed for patients undergoing rehabilitation. It also explores the challenges  
83 of operationalizing and analyzing the ICF core set assessment, specifically in terms of  
84 stratification and assignment scoring principles. This review emphasizes the value of IRT  
85 modeling in ICF studies and further categorizes IRT-derived ICF outcome measures according to  
86 the scoring principles. Moreover, the review proposes appropriate assignment principles that  
87 match the difficult parameter in IRT modeling and discusses the benefits of using Wright maps to  
88 visualize rehabilitation goals and potential functioning barriers. Overall, this review focuses on  
89 introducing a technique-solid and framework-sound questionnaire construction approach to  
90 develop the parsimonious core set of ICF and the Wright map that can enhance clinical decision-  
91 making in rehabilitation settings.

92

## 93 **Materials and Methods**

### 94 **Review Criteria**

95 This review focused on studies that explore the psychometric properties of the IRT-derived  
96 ICF evaluation tool. The search was carried out in January 31<sup>st</sup> 2023 based on the PubMed  
97 database. The keywords used during the search included the following: [(Rasch) AND  
98 (International Classification of Functioning, Disability and Health OR ICF), [(Item response  
99 theory OR IRT) AND (International Classification of Functioning, Disability and Health OR  
100 ICF)], and [(Mokken) AND (International Classification of Functioning, Disability and Health  
101 OR ICF)]. The reference lists of the resulting articles were scanned to identify further relevant  
102 studies, which totally resulted in 190 additional results. Note that in this paper, we adopted Rasch  
103 as an umbrella term that includes Rasch and the 1-parameter logistic (1PL) model.

104 After removing duplicate results, the search resulted in 169 pertinent articles. Given the  
105 search results, we employed the following inclusion and exclusion criteria to select relevant  
106 works for detailed review.

107

## 108 **Eligibility Criteria**

109 The inclusion and exclusion criteria for studies are as follows:

110 1) *Study design*: There was no strict study design required in this review. Reviews regarding  
111 the IRT-derived ICF evaluation tool were considered, languages: “English”, conference abstracts  
112 without the full text, and unpublished studies were excluded;

113 2) *Participant characteristics*: Participants irrespective of gender, age, and health conditions  
114 were evaluated via the ICF categories;

115 3) *Outcome measures*: The outcome measure or self-report questionnaire include ICF items  
116 in body structure, body function, activity and participation, and environmental factors.

117

## 118 **Results**

119 Our approach resulted in the identification of 46 publications that met all predetermined  
120 criteria ([Figure 1](#)). From each article, we extracted the information on several key variables,  
121 including the specific ICF core set, the original number of ICF categories, the number of IRT-  
122 based ICF categories, sample size, settings, response options, collapse strategy, scoring strategy,  
123 and data analysis software, which were summarized in [Table 1](#), [Table 2](#), [Table 3](#) and [Table 4](#).

## 124 **Sufficiency and Efficiency in Clinical Evaluation: Challenges of** 125 **Operationalizing the ICF Questionnaire**

126 The ICF provides a comprehensive taxonomy of function and disability, organized into four  
127 components, namely body structure, body functions, activity and participation, and  
128 environmental and personal contextual factors. However, the ICF functional category bank  
129 includes nearly 1,500 categories, making it impractical to assess each category in clinical  
130 practice. To address this challenge, the derivatives of ICF known as the ICF core set have been  
131 developed to evaluate functioning performance for specific health conditions or healthcare  
132 settings (Selb et al, 2015). There are two versions of the ICF core set: the comprehensive core set  
133 and the brief core set. A comprehensive ICF core set is inclined to exhaustively describe disease-  
134 specific functions, while it overloads the burden of answering lengthy and multi-item  
135 questionnaires on patients and clinicians. On the other hand, a brief ICF core set sacrifices the  
136 sufficiency of the questionnaire to satisfy the minimal standard of assessing the most essential  
137 functional categories. Despite the advantages of both core sets, two main issues are faced with

138 the operationalization of the ICF questionnaire, namely the complex scoring system and data  
139 analysis in the ICF Likert scale.

140 Firstly, the ICF category in the core set requires scoring on a 0-4 Likert scale, which might  
141 not be an efficient application in real clinical scenarios. There are controversies regarding how to  
142 apply the 5-level Likert scale to measure the degree of “disability” regarding each ICF category,  
143 namely, “no impairment” = 0, “mild impairment” = 1, “moderate impairment” = 2, “severe  
144 impairment” = 3, and “complete impairment” = 4 (Rauch, Cieza, and Stucki, 2008; Jette, 2018).  
145 Practitioners have not achieved full consensus on ICF category descriptions and differentiation  
146 between scale points, especially the qualifiers 2 to 4. Although researchers have suggested the  
147 employment of other assessment tools to assist in determining qualifier values, it significantly  
148 increases the complexity of the assessment process after expanding one questionnaire into  
149 multiple questionnaires. It will greatly expand the evaluation time due to a five-point rating scale  
150 for each item in either comprehensive or brief core sets. Thorough scoring options and extensive  
151 categories qualify the sufficiency of clinical assessment, but it is hard to satisfy the efficiency of  
152 evaluation in rapid-paced and hectic clinical work.

153 Another prominent barrier is the data analysis of the ICF Likert scale. Firstly, the summated  
154 scores represent the level of dysfunction depending on the uneven interval of the 5-point  
155 qualifier scale, which diminishes the inter- and intra-individual comparability of outcome  
156 measures. Secondly, each ICF category is considered as equal difficulty in the daily assessment  
157 rather than hierarchically categorize in terms of parameters such as item difficulty and  
158 discrimination. Without considering the quantitative values for item difficulties regarding certain  
159 individual abilities, simple qualifier values of each item are insufficient to represent the whole  
160 picture of clinical outcomes.

## 161 162 **Personal Ability and Item Difficulty: Principles and Values of the IRT-** 163 **derived Medical Outcome Measures**

164 Chang et al.(1995) proposed that the IRT could be a promising tool for measuring health  
165 outcomes and quantifying the degree of health, which has been applied in the medical field since  
166 the early 2000s (Hays, Morales, and Reise, 2000). The IRT model differentiates between an  
167 individual’s ability levels and the difficulty levels of test items, constructing an Item Response  
168 Function (IRF) by taking  $\theta$  as an independent variable and the probability of correct answer rate

169 (P( $\theta$ )) as a dependent variable, under the condition that test items do not interact with each other.  
170 For example, Liu et al.(2002) conducted a Rasch analysis on the Stroke Impairment Assessment  
171 Set (SIAS). After reducing subsets and combining similar items, the IRT-derived SIAS is not  
172 only transformed into a linear scale but also can reflect person abilities corresponding to item  
173 difficulties.

174 In recent years, there has been increasing interest in the use of IRT-based Rasch models for  
175 processing ICF evaluation data, which can be broadly categorized into two perspectives. The  
176 first approach involves handling ICF categories as questionnaire items, which has been used in  
177 various studies (Table 1, Table 2, Table 3, Table 4), such as the development of a 41-item  
178 activity measurement scale for post-acute care by Haley et al.(2004). Cieza et al.(2009b) also  
179 constructed the Rasch modeling based on the comprehensive assessment of the functional level  
180 among patients with rheumatoid arthritis (AS) and osteoarthritis (OA). By investigating 437  
181 patients with OA in Germany, Italy, Hungary, Serbia, and Singapore, researchers achieved the  
182 first ICF-based cross-cultural clinical functional measurement. They found that the difficulty of  
183 the same ICF category varied in different countries. The Rasch analysis also explored ICF  
184 categories for various conditions or diseases, including AS(Cieza et al, 2009a), OA(Cieza et al,  
185 2009b; Kurtaiş et al, 2011), chronic widespread pain(Prodinger et al, 2012), low back  
186 pain(Bagraith, Strong, Meredith, and McPhail, 2017; Røe et al, 2009; Røe, Bautz-Holter, and  
187 Cieza, 2013), breast cancer(Yang, Shin, Shin, and Lim, 2014), children and youth with  
188 disabilities(Illum and Gradel, 2015), the ICF Generic Set(Ehrmann et al, 2018), the  
189 Rehabilitation Set(Gao et al, 2020), spinal cord injury (SCI)(Li et al, 2018; Jia et al, 2020),  
190 stroke(Feng, Jiang, Sun, and Lin, 2022), haemophilia(Feng et al, 2022), and cerebral palsy(Jiang  
191 et al, 2023).

192 The second approach involves linking questionnaire items from scales to ICF items, which  
193 has been applied in several studies(Finch, Higgins, Wood-Dauphinee, and Mayo, 2009; Maritz et  
194 al, 2022; Nilsson, Westergren, Carlsson, and Hagell, 2010, 2010; Prodinger, O'Connor, Stucki,  
195 and Tennant, 2017; Van de Winckel et al, 2019). Finch et al.(2009) discerned 44 items from  
196 other scales and constructed a Rasch model based on the ICF framework to evaluate the level of  
197 physical function in patients three months post-stroke. They obtained an item difficulty list  
198 consisting of 52 items, and suggested that stroke rehabilitation goals and treatment plans could  
199 be developed based on person abilities and item difficulties. This approach has been shown to be

200 useful for identifying functional limitations and developing interventions that target specific  
201 areas of impairment. Other studies have used similar approaches to link scales to the ICF  
202 framework for various health conditions, including Parkinson’s Disease(Nilsson, Westergren,  
203 Carlsson, and Hagell, 2010), stroke(Van de Winckel et al, 2019), spinal cord injury(Maritz et al,  
204 2022), demonstrating the versatility and applicability of this method in the assessment of  
205 functional outcomes.

206

## 207 **Research Progress and Deficiency: Clarification of the ICF-based IRT** 208 **Scoring Principles**

209 ICF-based IRT studies employ two dimensions of scoring principles, stratification and  
210 assignment. The stratification dimension involves sparse and dense stratification principles to  
211 grade each ICF category. The sparse stratification principle (SSP) can involve scoring each ICF  
212 category with qualifiers 0 for ‘no impairment/limitation’, 1 for ‘impairment/limitation’ instead of  
213 adopting the original 5-level Likert scale(2005), or utilizing collapse strategies, item combination,  
214 and item deletion during data analysis. Some studies suggest that reducing the five-point to  
215 three-point qualifiers leads to a better model fit. For example, Li et al. (2018) found that reducing  
216 the five-point (01234) to the three-point (01112) qualifiers improves the overall model fit. Gao et  
217 al.(2020) also recommend using a collapse strategy and converting from 01234 to 01223 or  
218 01112 in the Rasch model when operating the ICF five-point qualifiers as a rating scale. On the  
219 other hand, the dense stratification principle (DSP) expands qualifiers to capture more detailed  
220 clinical information and reduce the ceiling and floor effect, using an 11-point numeric rating  
221 scale and transforming raw scores to the Rasch-based interval score(Ehrmann et al, 2018). The  
222 SSP is broadly endorsed for the qualifiers in terms of enough items, such as 65 ICF categories of  
223 SCI(Li et al, 2018). The DSP is more comprehensive but requires fewer items, such as the  
224 Generic 6 set(Ehrmann et al, 2018) in [Table 2](#).

225 Considering assignment dimension, most ICF-based IRT studies have typically employed  
226 the “descending assignment principle or assigning by dysfunction (ABD)” to address item scores  
227 based on functional ability, where lower functionality corresponds to a higher score. Some  
228 examples of studies that have employed this principle include Farin et al.(2007), Cieza et  
229 al.(2009a), Røe et al.(2013), Ehrmann et al.(2018), Guo et al. (2020), and Gao et al.(2020).  
230 However, a few studies have taken an alternative approach, using the “ascending assignment



231 principle or assigning by functioning (ABF)”, where a higher score corresponds to higher  
232 functionality(Feng et al, 2022; Feng, Jiang, Sun, and Lin, 2022; Jiang et al, 2023). Okochi et  
233 al.(2013) implemented the binary response options, scoring items as “yes” for functioning  
234 (assignment = 1), or “no” for dysfunction (assignment = 0). According to the final scores, they  
235 classified individuals into functional stages based on their activity level. The Lucerne ICF-based  
236 Multidisciplinary Observation Scale (LIMOS) also adopted the ascending assignment principle  
237 by generating 45 ICF-similar items based on the degree of assistance in daily life(Van de  
238 Winckel et al, 2019).

239

## 240 **Discussion**

241 To achieve an optimal balance between sufficiency and efficiency in clinical assessment, it  
242 is imperative to develop a concise and effective core set from the larger and more comprehensive  
243 ICF core set. This core set should contain minimal yet discriminative items, capturing continuous  
244 functioning changes, and ensuring good construct validity and internal consistency. The  
245 implementation of the IRT statistical approach has been used to derive such a measurement tool,  
246 which we refer to as the ICF parsimonious core set (PCS).

247 By overcoming the limitation of assuming that each functional item is equally difficult, the  
248 IRT modeling approach has proven to be an effective way to extract PCSs. It has been applied  
249 since the inception of the ICF and has demonstrated its effectiveness over the last two decades.  
250 The IRT-derived outcome measure has the potential to serve as a pragmatic tool that provides  
251 comprehensive and holistic information that can facilitate decision-making in clinical settings.

252

## 253 **Future Implication: the ICF Framework and IRT Technique**

254 As the most commonly used IRT model, the Rasch analysis can optimize clinical scales due  
255 to its ability to enhance the construct validity of clinical scales and reduce the indiscriminate  
256 items. Based on different configurations of parameters, the IRF can be presented as an S-shaped  
257 Item Characteristic Curve (ICC, [Figure 2](#)) on the coordinate axis. This statistical model  
258 overcomes the limitation of the classical test model, which assumes that each item is equally  
259 difficult. The IRT recognizes that item difficulty is represented by parameters and maps the  
260 locations of individuals and the difficulties of test items onto the same invariant scale, allowing  
261 direct comparison.

262 The IRT-based measurement of individual ability has important implications for clinical  
263 assessment in rehabilitation practice. It can help identify an individual's functional level  
264 compared to others with the same disease, as well as assess whether a specific function has  
265 improved following intervention. Additionally, the IRT-based estimation of item difficulty can  
266 aid in prioritizing rehabilitation goals by determining which functional items are most  
267 appropriate for an individual's abilities and which dysfunctions should be addressed first.

268 [Supplemental Table 1](#) displays four parameters within the IRT model, where the parameter  
269 “difficulty (d)” is primarily reserved in parametric IRT models. As an illustration, the Rasch  
270 model only estimates the “difficulty” parameter, and uses default values of  $a = 1$  (moderate  
271 discrimination),  $g = 0$  (no guess), and  $u = 1$  (completely carefulness). The parameters  $\theta$  and  $d$  can  
272 be expressed numerically on the same scale, namely logit or the log-odds (the logarithm of the  
273 frequency ratio of scored and non-scored items). Consequently, individual functional status can  
274 be sorted by person abilities, and different items can be hierarchized according to item  
275 difficulties. Moreover, person abilities and item difficulties can be compared on the same scale,  
276 allowing for the identification of whether an item is relatively difficult ( $\theta < d$ ) or relatively easy  
277 ( $\theta > d$ ) for a person with a certain ability level ( $\theta$ ). The IRT model can also convert an ICF  
278 Likert scale with ordinal response options into an equidistant scale(Prodingner et al, 2020).

279 The parameters,  $g$  and  $u$ , offer an opportunity to identify and address issues with the quality  
280 of the ICF assessment scale. For instance, if a model reports an item with high guessing or  
281 carelessness, the evaluators or clinical practices in the institution should audit certain functioning  
282 evaluation processes to improve the assessment quality.

283

## 284 **The Scoring Principle: Sparse Scoring principle and Assigning by Functioning**

285 The SSP and DSP principles are useful in different contexts, with the SSP being more  
286 efficient and the DSP being more comprehensive, as shown in [Figure 3](#). From an efficiency  
287 perspective, the stratification principle of qualifiers aligns with the SSP, such as screening tools  
288 ([Table 3](#)). In contrast, research tools with a large number of items and DSP can capture  
289 functional limitations comprehensively. To strike a balance between sufficiency and efficiency, it  
290 is recommended to adopt more items in ICF core sets, while using SSP for detailed assessments  
291 ([Table 4](#)). A recent study by Feng et al.(2022) extracted 118 categories of “b” and “d”  
292 components from the ICF categories for stroke and used a dichotomous qualifying strategy

293 (dysfunction = 0 or functioning = 1) for IRT modeling. The final Rasch-derived ICF scale  
294 consisted of 45 items. This approach enabled simplified assessment of comprehensive ability  
295 levels and allowed for scoring of functional categories based on ICF qualifier scores. By utilizing  
296 a binary response pattern, the approach may further enhance efficiency.

297 In terms of assignment scoring principles, the ABD principle and the ABF principle have no  
298 difference in assessing an individual's functional capacity. A reduction in dysfunction or an  
299 improvement in functional level is typically considered an improvement result. However,  
300 differences between the two principles become evident in IRT analyses and guiding treatment  
301 plans. The logit value of item difficulty is the primary contradiction of evaluation and treatment  
302 in rehabilitation services. The ABD principle presents a semantic dilemma in clinical thinking as  
303 it indicates how difficult it is to disable a certain function. On the other hand, the ABF principle  
304 aligns with the clinical treatment thinking process of improving functional capacity, and only the  
305 logit value of an individual's potential traits derived from the principle of ABF would reflect the  
306 level of individual function. As assessment is in the service of treatment, researchers have  
307 recommended adopting the ABF principle in future ICF studies(Feng, Jiang, Sun, and Lin, 2022;  
308 Feng et al, 2022).

309

## 310 **The IRT-derived ICF Parsimonious Core Set and Wright Map**

311 The ICF-based IRT questionnaire, constructed with the principles of sufficiency and  
312 efficiency, uses a binary response pattern to increase efficiency. ABF scoring aligns with  
313 difficulty parameter in the IRT modeling, and the resulting IRT-derived PCS has high internal  
314 consistency and construct validity. This ICF PCS contains the most discriminable and minimal  
315 items, making it ideal for a clinical-pragmatic approach. Empirical evidence from PCS  
316 measurement tools, such as the stroke simplified IRT assessment tool(Feng, Jiang, Sun, and Lin,  
317 2022), IRT-derived and ICF-based haemophilic activity and participation assessment tool(Feng  
318 et al, 2022), and ICF-based IRT assessment tool(Jiang et al, 2023) for children with cerebral  
319 palsy, demonstrates its efficacy in assessing functional stages.

320 A novel approach to prioritizing daily activities intervention can be achieved by  
321 understanding the difficulty levels of diverse functional activities. The Wright map, which plots  
322 person abilities and item difficulties with the same unit (i.e., logit), orders the level of functional  
323 ability of participants on the left side and the difficulty of functional categories on the right side

324 (Figure 4 © 2022 John Wiley & Sons Ltd.). The most difficult functional categories are at the  
325 top of the scale, while the easiest ones are at the bottom. Subjects with low functional ability  
326 struggle with even the easiest activities, while those with higher functional ability experience no  
327 difficulty performing body functions or activities.

328 Recent advancements in technology and data analytics enable the use of IRT-derived PCS  
329 functioning outcome measures to personalize interventions that improve functioning and quality  
330 of life. The Wright map provides evidence for customized rehabilitation goals by integrating  
331 person abilities and item difficulties. Item difficulties can be used to estimate rehabilitation goals,  
332 such as the level of difficulty in improving a specific function from a low stage to a high stage.  
333 Additionally, several functioning properties can provide more proxy goals for rehabilitation  
334 therapy.

335

## 336 **Conclusion**

337 The use of the IRT technique in ICF studies has highlighted a number of contradictions,  
338 such as the trade-offs between efficiency and adequacy, comprehensiveness and precision,  
339 assessment and treatment, and disability and health. In the context of humanism in healthcare,  
340 the fundamental goal of function evaluation and treatment intervention must be to optimize  
341 patient outcomes. To achieve this, we can consider the following suggestions through  
342 comparative analysis: (1) Streamline the stratification of qualifiers to achieve efficient evaluation,  
343 while increasing the number of scale items to ensure comprehensive assessment; (2) Adhere to  
344 the principle of “assigning by functioning” when scoring items to promote clinical-relevant and  
345 intuitive thinking in tailoring treatment plans; (3) Adoption of the Wright map (person-item  
346 threshold map) might facilitate patient-oriented care according to person abilities and item  
347 difficulties.

348

## 349 **Acknowledgment**

350 Not applicable.

## 351 **Declaration of Interest Statement**

352 The authors declare that the research was conducted in the absence of any commercial or  
353 financial relationships that could be construed as a potential conflict of interest.

354

### 355 **Ethical Approval and Consent to Participate**

356 Not applicable.

### 357 **Data Availability Statement**

358 Data sharing not applicable to this article as no datasets were generated or analyzed during the  
359 current study.

### 360 **Funding**

361 This research is sponsored by Shanghai Sailing Program (23YF1433700).

### 362 **Author contribution**

363 CF and LF conceived the original idea. CF and LF designed and performed the review and wrote  
364 the manuscript. LF offered essential idea to the review design. CF and LF edited the manuscript.  
365 SGL gave comments on the review design. All authors discussed the conclusions and  
366 commented on the manuscript.

367

### 368 **Reference**

369 Bagraith KS, Strong J, Meredith PJ, McPhail SM 2017 Rasch Analysis Supported the Construct Validity of  
370 Self-Report Measures of Activity and Participation Derived from Patient Ratings of the ICF Low Back Pain  
371 Core Set. *Journal of Clinical Epidemiology* 84: 161–172.

372 Chang WC, Chan C 1995 Rasch Analysis for Outcomes Measures: Some Methodological Considerations.  
373 *Archives of Physical Medicine and Rehabilitation* 76: 934–939.

374 Cieza A, Hilfiker R, Boonen A, Heijde D van der, Braun J, Stucki G 2009a Towards an ICF-Based Clinical  
375 Measure of Functioning in People with Ankylosing Spondylitis: A Methodological Exploration. *Disability  
376 and Rehabilitation* 31: 528–537.

377 Cieza A, Hilfiker R, Chatterji S, Kostanjsek N, Ustün BT, Stucki G 2009b The International Classification of  
378 Functioning, Disability, and Health Could Be Used to Measure Functioning. *Journal of Clinical  
379 Epidemiology* 62: 899–911.

380 Ehrmann C, Prodinger B, Stucki G, Cai W, Zhang X, Liu S, Liu S, Li J, Reinhardt JD 2018 ICF Generic Set as  
381 New Standard for the System Wide Assessment of Functioning in China: A Multicentre Prospective Study  
382 on Metric Properties and Responsiveness Applying Item Response Theory. *BMJ Open* 8: e021696.

383 Farin E, Fleitz A, Frey C 2007 Psychometric Properties of an International Classification of Functioning,  
384 Disability and Health (ICF)-Oriented, Adaptive Questionnaire for the Assessment of Mobility, Self-Care  
385 and Domestic Life. *Journal of Rehabilitation Medicine* 39: 537–546.

- 386 Feng C, Geng B-F, Liu S-G, Jiang Z-L, Lin F 2022 Activity and participation in haemophiliacs: Item response  
387 modelling based on international classification of functioning, disability and health. *Haemophilia*.
- 388 Feng C, Jiang Z-L, Sun M-X, Lin F 2022 Simplified Post-stroke Functioning Assessment Based on ICF via  
389 Dichotomous Mokken Scale Analysis and Rasch Modeling. *Frontiers in Neurology* 13: 827247.
- 390 Finch LE, Higgins J, Wood-Dauphinee SL, Mayo NE 2009 A Measure of Physical Functioning to Define  
391 Stroke Recovery at 3 Months: Preliminary Results. *Archives of Physical Medicine and Rehabilitation* 90:  
392 1584–1595.
- 393 Gao Y, Yan T, You L, Li K, Zhang L, Zhang M 2020 Psychometric Properties of the International  
394 Classification of Functioning, Disability and Health Rehabilitation Set: A Rasch Analysis. *International*  
395 *Journal of Rehabilitation Research* 44: 144–151.
- 396 Grill E, Stucki G, Boldt C, Joisten S, Swoboda W 2005 Identification of relevant ICF categories by geriatric  
397 patients in an early post-acute rehabilitation facility. *Disability and Rehabilitation* 27: 467–473.
- 398 Guo C, Liu Y, Hao S, Xie L, Xiang G, Wu Y, Li S 2020 The Reliability and Validity of the “Activity and  
399 Participation” Component in the Brief ICF Core Set for Chronic Obstructive Pulmonary Diseases Based on  
400 Rasch Analysis. *International Journal of Chronic Obstructive Pulmonary Disease* 15: 1191–1198.
- 401 Haley SM, Coster WJ, Andres PL, Ludlow LH, Ni P, Bond TL, Sinclair SJ, Jette AM 2004 Activity outcome  
402 measurement for postacute care. *Medical Care* 42: 149–161.
- 403 Hays RD, Morales LS, Reise SP 2000 Item Response Theory and Health Outcomes Measurement in the  
404 21st Century. *Medical Care* 38: 1128–1142.
- 405 Illum NO, Gradel KO 2015 Assessing Children With Disabilities Using WHO International Classification of  
406 Functioning, Disability and Health Child and Youth Version Activities and Participation D Codes. *Child*  
407 *Neurology Open* 2: 2329048X15613529.
- 408 Jette AM 2018 The Utility of and Need for Improving the ICF. *Physical Therapy* 98: 629–630.
- 409 Jia M, Tang J, Xie S, He X, Wang Y, Liu T, Yan T, Li K 2020 Using a Mobile App-Based International  
410 Classification of Functioning, Disability, and Health Set to Assess the Functioning of Spinal Cord Injury  
411 Patients: Rasch Analysis. *JMIR MHealth and UHealth* 8: e20723.
- 412 Jiang Y-E, Zhang D-M, Jiang Z-L, Tao X-J, Dai M-J, Lin F 2023 ICF-Based simple scale for children with  
413 cerebral palsy: Application of Mokken scale analysis and Rasch modeling. *Developmental*  
414 *Neurorehabilitation* 1–18.
- 415 Kurtaiş Y, Öztuna D, Küçükdeveci AA, Kutlay Ş, Hafiz M, Tennant A 2011 Reliability, construct validity and  
416 measurement potential of the ICF comprehensive core set for osteoarthritis. *BMC Musculoskeletal*  
417 *Disorders* 12: 255.
- 418 Li K, Yan T, You L, Xie S, Li Y, Tang J, Wang Y, Gao Y 2018 Psychometric Properties of the International  
419 Classification of Functioning, Disability and Health Set for Spinal Cord Injury Nursing Based on Rasch  
420 Analysis. *Disability and Rehabilitation* 40: 338–345.

- 421 Liu M, Chino N, Tuji T, Masakado Y, Hase K, Kimura A 2002 Psychometric Properties of the Stroke  
422 Impairment Assessment Set (SIAS). *Neurorehabilitation and Neural Repair* 16: 339–351.
- 423 Maritz R, Fellinghauer C, Brach M, Curt A, Gmünder HP, HOPFE M, HUND-GEORGIADIS M, JORDAN X,  
424 SCHEEL-SAILER A, STUCKI G 2022 A Rasch-Based Comparison of the Functional Independence Measure  
425 and Spinal Cord Independence Measure for Outcome and Quality in the Rehabilitation of Persons with  
426 Spinal Cord Injury. *Journal of Rehabilitation Medicine* 54: 82.
- 427 Nilsson MH, Westergren A, Carlsson G, Hagell P 2010 Uncovering Indicators of the International  
428 Classification of Functioning, Disability, and Health from the 39-Item Parkinson’s Disease Questionnaire.  
429 *Parkinson’s Disease* 2010: 984673.
- 430 Okochi J, Takahashi T, Takamuku K, Escorpizo R 2013 Staging of Mobility, Transfer and Walking Functions  
431 of Elderly Persons Based on the Codes of the International Classification of Functioning, Disability and  
432 Health. *BMC Geriatrics* 13: 16.
- 433 Prodinge B, Küçükdeveci AA, Kutlay S, Elhan AH, Kreiner S, Tennant A 2020 Cross-Diagnostic Scale-  
434 Banking Using Rasch Analysis: Developing a Common Reference Metric for Generic and Health  
435 Condition-Specific Scales in People with Rheumatoid Arthritis and Stroke. *Journal of Rehabilitation  
436 Medicine* 52: jrm00107.
- 437 Prodinge B, O’Connor RJ, Stucki G, Tennant A 2017 Establishing Score Equivalence of the Functional  
438 Independence Measure Motor Scale and the Barthel Index, Utilising the International Classification of  
439 Functioning, Disability and Health and Rasch Measurement Theory. *Journal of Rehabilitation Medicine*  
440 49: 416–422.
- 441 Prodinge B, Salzberger T, Stucki G, Stamm T, Cieza A 2012 Measuring Functioning in People with  
442 Fibromyalgia (FM) Based on the International Classification of Functioning, Disability and Health (ICF)--a  
443 Psychometric Analysis. *Pain Practice: The Official Journal of World Institute of Pain* 12: 255–265.
- 444 Rauch A, Cieza A, Stucki G 2008 How to apply the International Classification of Functioning, Disability  
445 and Health (ICF) for rehabilitation management in clinical practice. *Eur J Phys Rehabil Med* 44: 329–42.
- 446 Røe C, Bautz-Holter E, Cieza A 2013 Low Back Pain in 17 Countries, a Rasch Analysis of the ICF Core Set  
447 for Low Back Pain. *International Journal of Rehabilitation Research Internationale Zeitschrift Fur  
448 Rehabilitationsforschung Revue Internationale De Recherches De Readaptation* 36: 38–47.
- 449 Røe C, Sveen U, Geyh S, Cieza A, Bautz-Holter E 2009 Construct Dimensionality and Properties of the  
450 Categories in the ICF Core Set for Low Back Pain. *Journal of Rehabilitation Medicine* 41: 429–437.
- 451 Rolstad S, Adler J, Rydén A 2011 Response Burden and Questionnaire Length: Is Shorter Better? A  
452 Review and Meta-analysis. *Value in Health* 14: 1101–1108.
- 453 Selb M, Escorpizo R, Kostanjsek N, Stucki G, Üstün B, Cieza A 2015 A Guide on How to Develop an  
454 International Classification of Functioning, Disability and Health Core Set. *European Journal of Physical  
455 and Rehabilitation Medicine* 51: 105–117.
- 456 Stucki G, Rubinelli S, Bickenbach J 2020 We Need an Operationalisation, Not a Definition of Health.  
457 *Disability and Rehabilitation* 42: 442–444.

- 458 Van de Winckel A, Ottiger B, Bohlhalter S, Nyffeler T, Vanbellinghen T 2019 Comprehensive ADL Outcome  
459 Measurement after Stroke: Rasch Validation of the Lucerne ICF-Based Multidisciplinary Observation  
460 Scale (LIMOS). Archives of Physical Medicine and Rehabilitation 100: 2314–2323.
- 461 Yang EJ, Shin E-K, Shin H-I, Lim J-Y 2014 Psychometric Properties of Scale Constructed from the  
462 International Classification of Functioning, Disability and Health (ICF) Core Set for Breast Cancer Based  
463 on Rasch Analysis. Supportive Care in Cancer: Official Journal of the Multinational Association of  
464 Supportive Care in Cancer 22: 2839–2849.





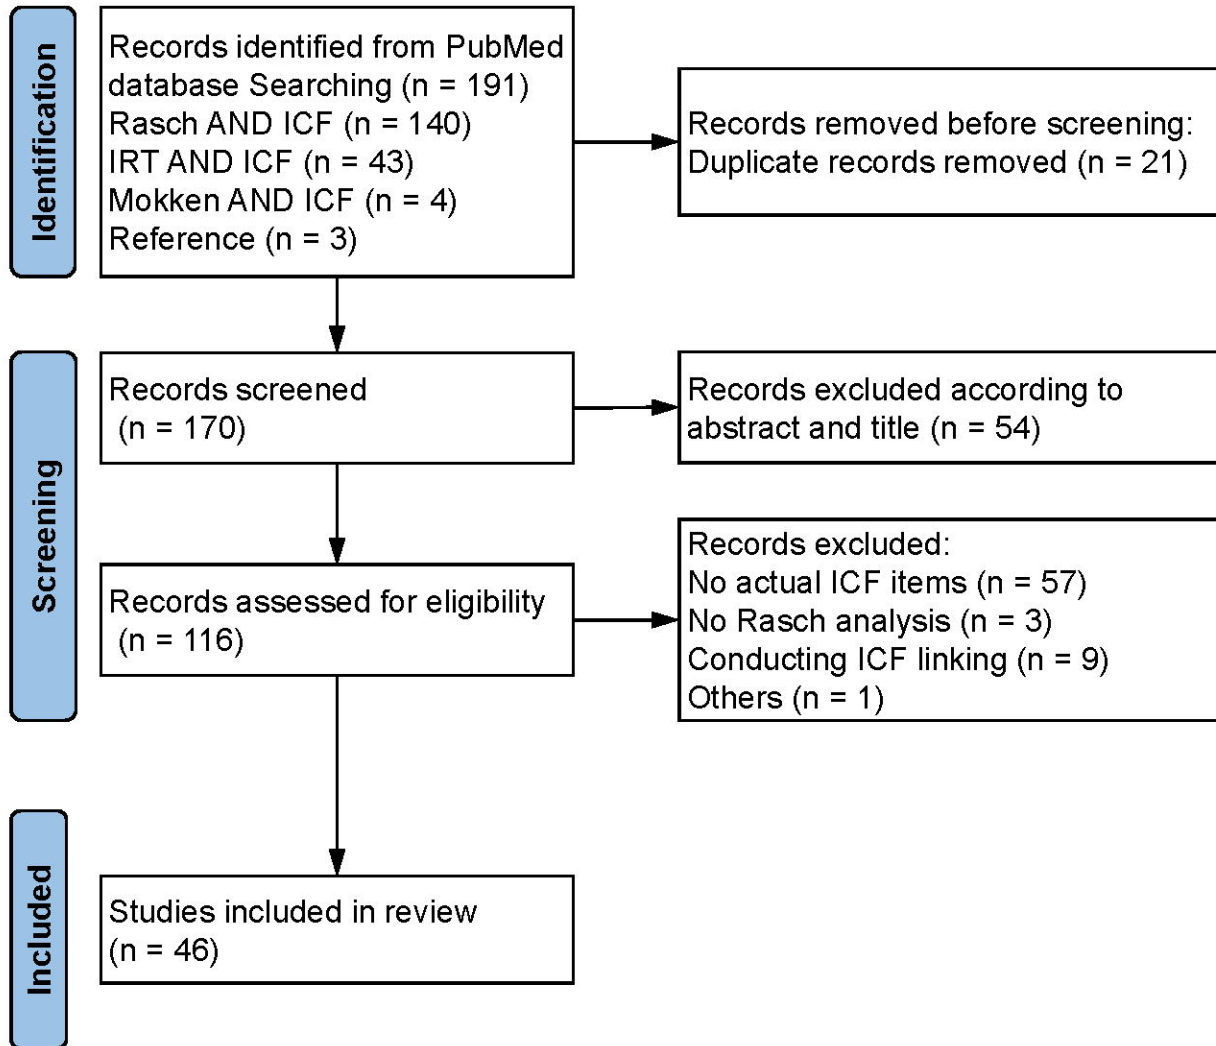

—  $a=1, b=0, g=0, u=0.8$  —  $a=1, b=0, g=0, u=1$  —  $a=1, b=0, g=0.2, u=1$  —  $a=2, b=0.5, g=0, u=1$

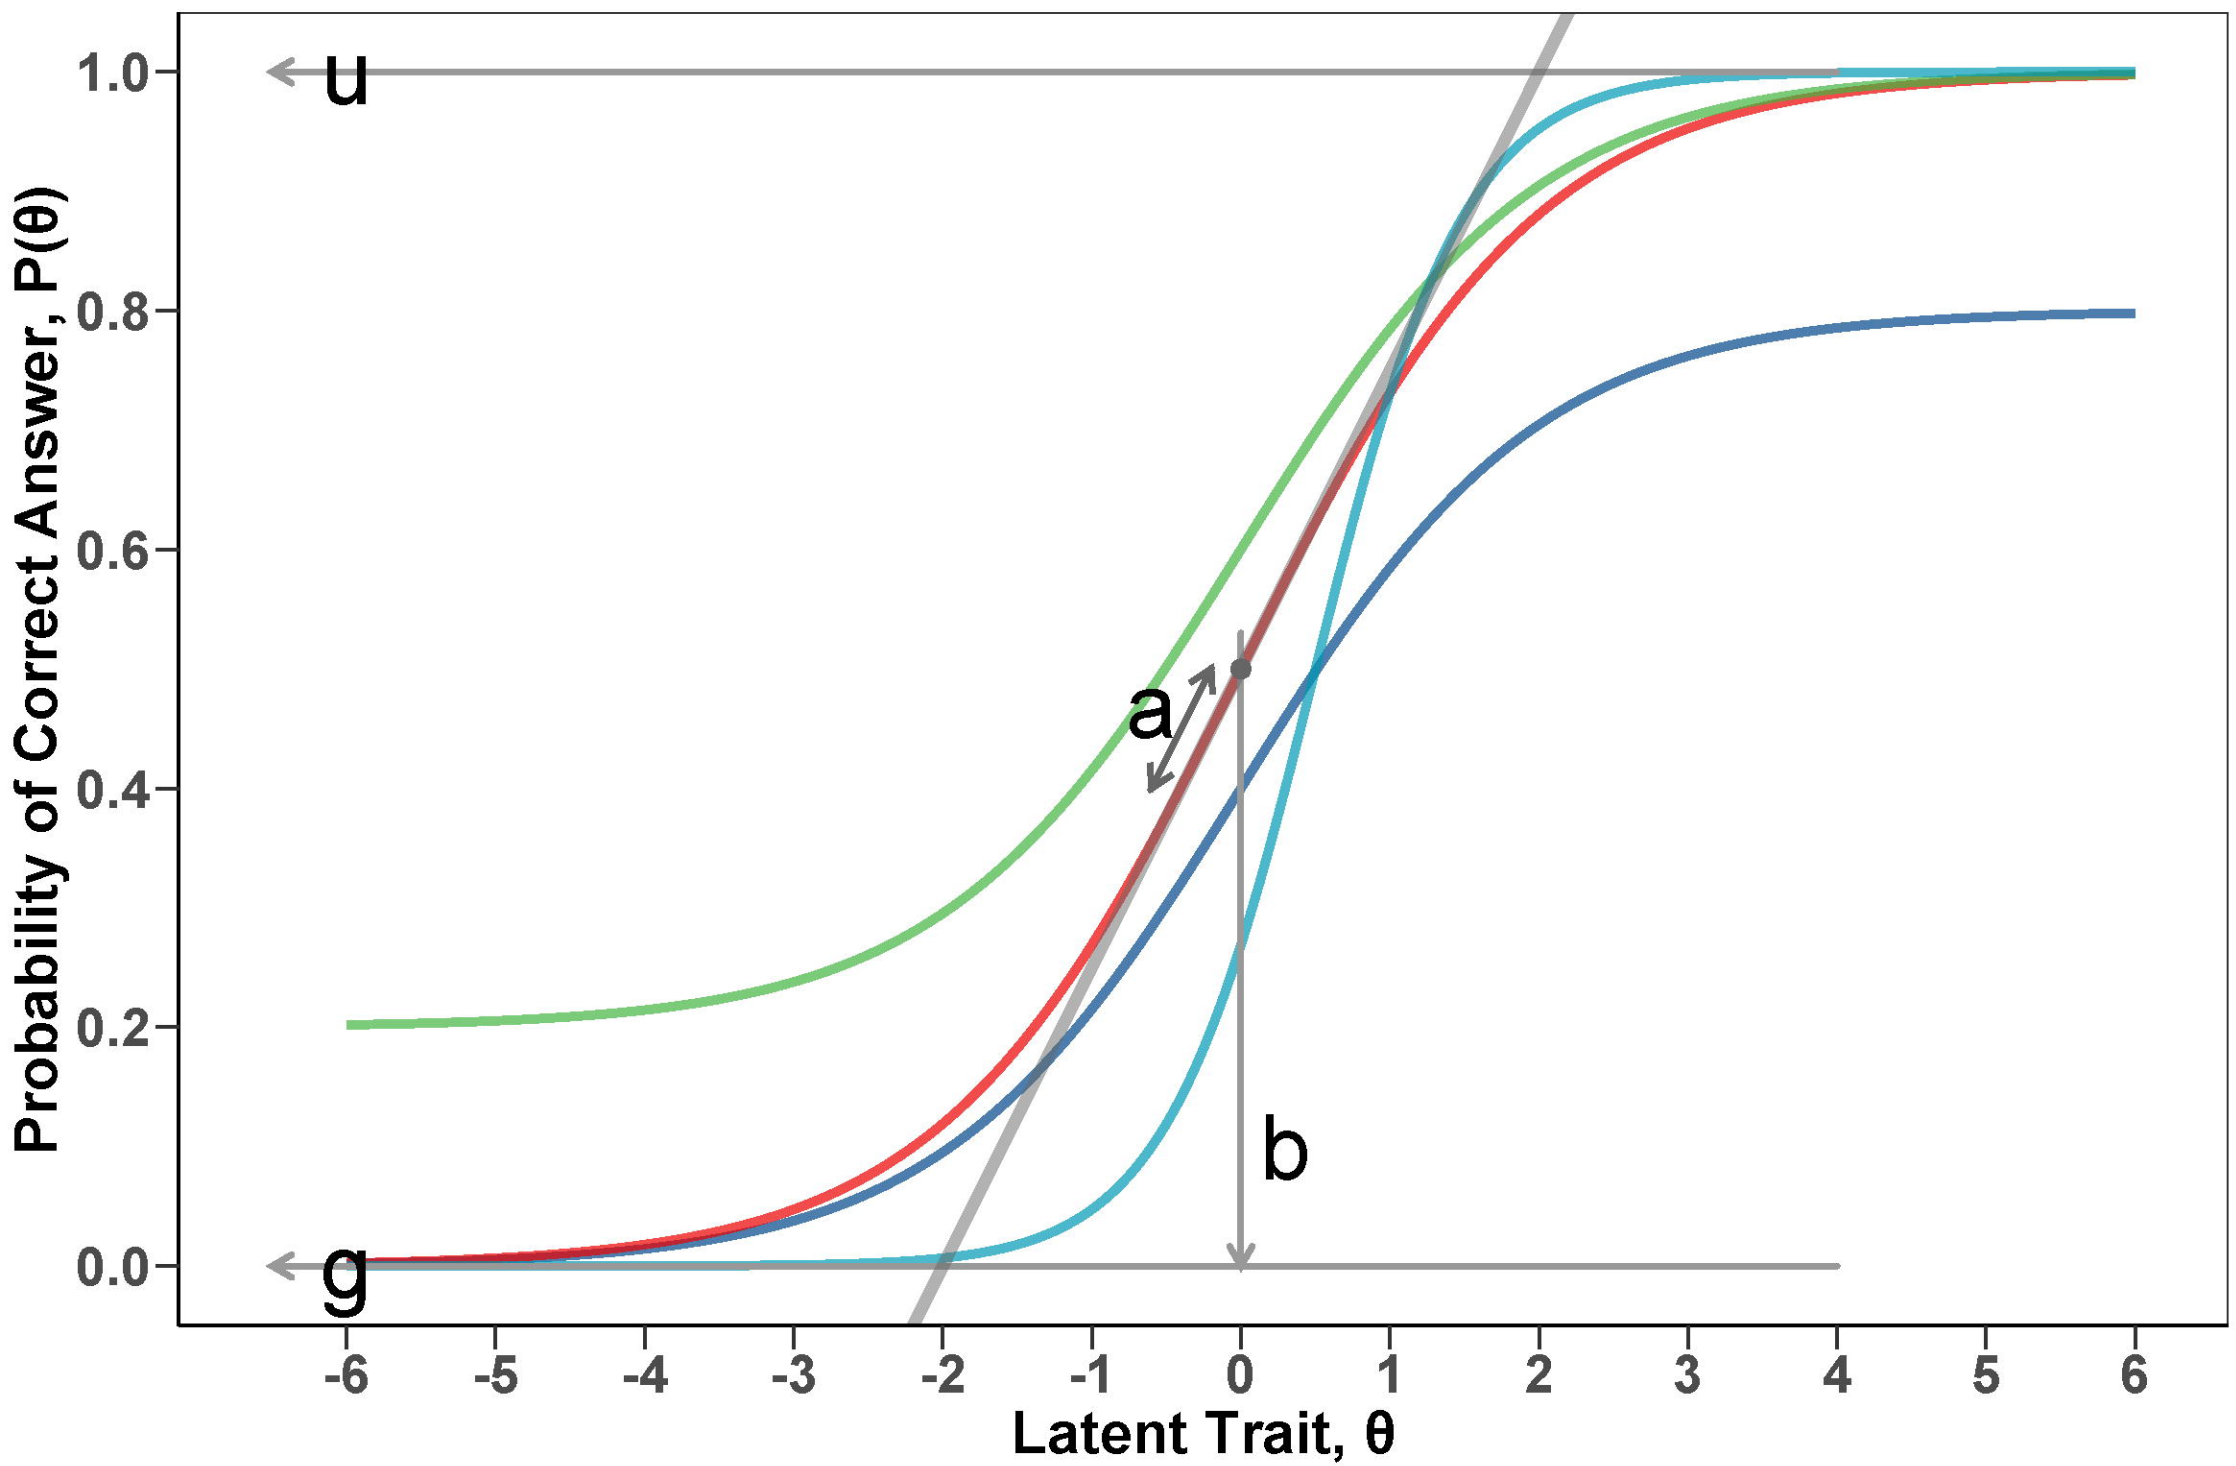

ABD, e.g., 0 = functioning, 1=dysfunction

### Assignment Principles

$\theta$  of individual (latent ability/location):  
Disability level

ABF, e.g., 0 = dysfunction, 1 = functioning

b of item (item difficulty):  
How hard is it to disable the function?

Assessment

$\theta$  of individual (latent ability/location):  
Functioning level

&

Treatment

b of item (item difficulty):  
How hard is it to improve the functional capacity?  
To what extent is this function treatable?

Efficiency

With few qualifiers  
e.g., 0 & 1, totally 2 levels  
Simplest for each item  
Less information  
High efficiency

SSP

**Screening Tools**  
SSP  
& Less items

**Clinical A&T**  
SSP  
& More items

With more qualifiers  
e.g., 0-10, totally 11 levels  
Difficult for grading  
Sufficient information  
Low efficiency

DSP

X

**Research Tools**  
DSP  
& More Items

Low

Less items

High

More Items

Sufficiency

Abbreviations:

ABF: Assigning by Functioning

ABD: Assigning by Dysfunction

A&T: Assessment and Treatment

SSP: Sparse Stratification Principle

DSP: Dense Stratification Principle

To reduce item number.  
Minimum is only 1 item.  
The latent ability is defined by a few items or even single item.  
Most specific.  
Information richness depends on stratification principles.

To expand item number.  
Maximum can exceed 150 items, e.g., stroke core set with 166 items.  
The latent ability is measured by an integrated set of items.  
Most comprehensive.  
Time consumption depends on stratification principles.

### Stratification Principles

Specific Person: C-J.P.  
 Dashed Line:  $\theta = 0.7564$  logit.  
 Dotted Line: reference line of 0 logit.

### Dysfunction items

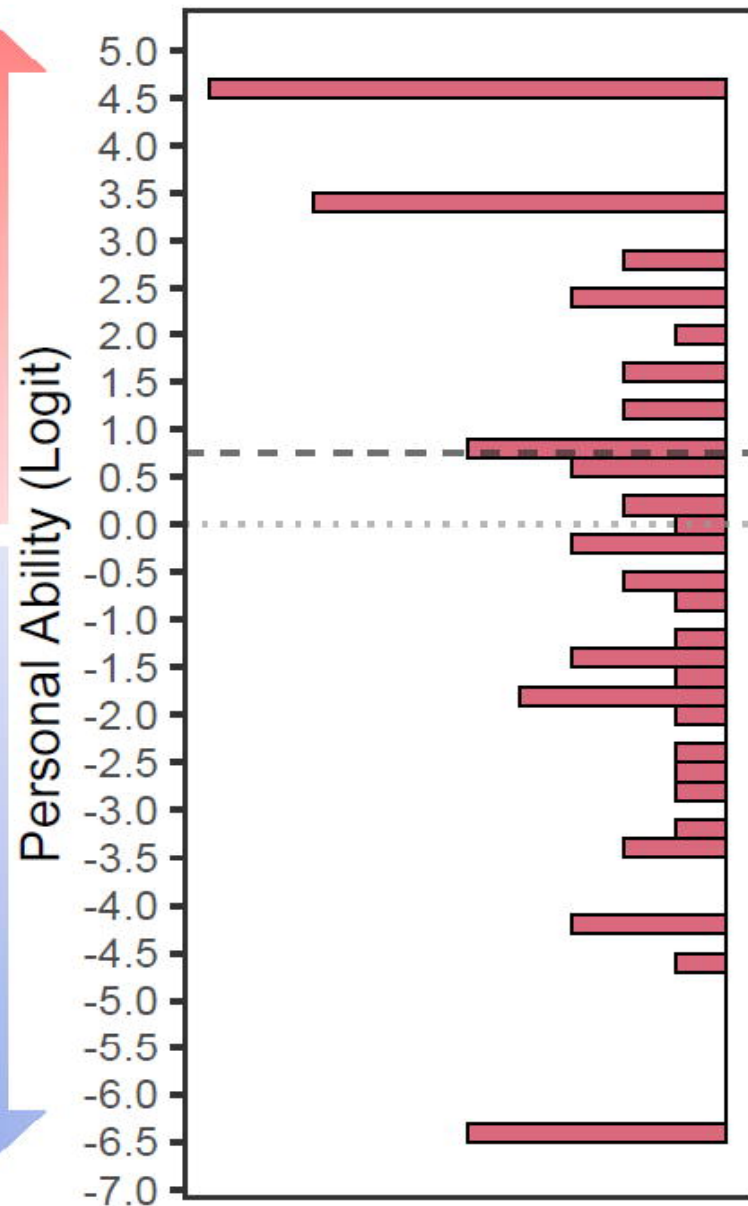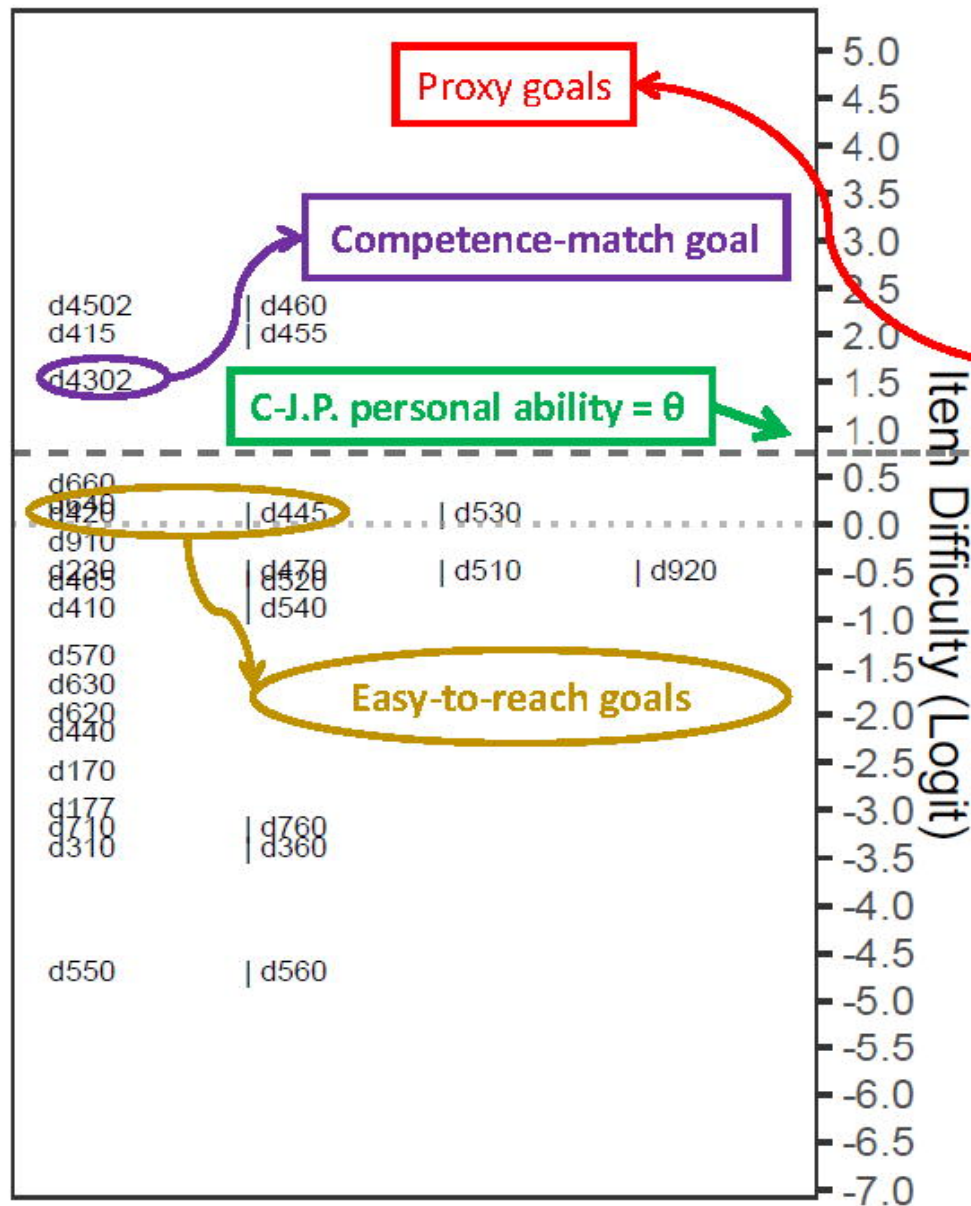

**The higher, the more difficult**

**C-J.P. Dysfunction Lists**

d4502 | d460  
 d415 | d455  
 d4302  
 d640  
 d420 | d445

**The lower, the easier**

- Reference:
- d4502 Walking on different surfaces
  - d460 Moving around in different locations
  - d415 Maintaining a body position
  - d455 Moving around
  - d4302 Carrying in the arms
  - d640 Doing housework
  - d420 Transferring oneself
  - d445 Hand and arm use

## **Figure legend**

**Figure 1.** The Flow diagram of study selection.

**Figure 2.** Schematic diagram of the ICC curve.

The illustration of the effect of four parameter were respectively depicted on the shape of the ICC (a = discrimination/slope, b = difficulty/location/threshold, g = pseudo-guessing/lower asymptote, u = upper asymptote/slipping/pseudo-carelessness)

**Figure 3.** Exploration of efficiency and sufficiency in the research paradigm of the ICF-based evaluation tools.

**Figure 4.** Personal ability and item difficulty constructed in the Wright map. The left column illustrates the personal ability corresponding to the item difficulty in the right column © 2022 John Wiley & Sons Ltd.

**Table 1. Dense Stratification Principle and more items based on the ICF-based IRT modeling**

| Author, year          | ICF Items                                                                      | Candidate ICF Item        | Item bank    | Sample Size | Setting                                                            | Response Options                                                               | Collapse Strategy | Assigning Principle (A or D) | Software                                    |
|-----------------------|--------------------------------------------------------------------------------|---------------------------|--------------|-------------|--------------------------------------------------------------------|--------------------------------------------------------------------------------|-------------------|------------------------------|---------------------------------------------|
| Haley et al., 2004    | ICF Activity domains                                                           | 58                        | 41           | 477         | Post-acute care                                                    | Not at all/a little/somewhat/a lot/complete, can't do                          | NA                | A                            | WINSTEPS                                    |
| Farin et al., 2007    | "d5 self-care", "d6 domestic life", "d4 mobility", MOSES Patient Questionnaire | 95                        | 58           | 1019        | Musculoskeletal disease, cardiac disease, neurology rehabilitation | No difficulty/mild difficulty/moderate difficulty/severe difficulty/impossible | NA                | A                            | WINSTEPS                                    |
| Farin et al., 2009    | MOSES Physician Questionnaire                                                  | 58 items of Moses-Patient | 47           | 1019        | Musculoskeletal disease, cardiac disease, neurology rehabilitation | No difficulty/mild difficulty/moderate difficulty/severe difficulty/impossible | NA                | A                            | WINSTEPS                                    |
| Ballert et al., 2014  | ICF Core Sets for SCI                                                          | 264                       | Not Reported | 1048        | Early post-acute and long-term                                     | ICF generic qualifier scale                                                    | NA                | D                            | R software eRm package                      |
| Tutelyan et al., 2014 | HF-ICF-60 measure                                                              | 60                        | 60           | 500         | Disability and healthy respondents                                 | No problem (0) to extreme problem (5)                                          | NA                | D                            | RUMM2030                                    |
| Illum et al., 2015    | ICF-CY                                                                         | 57                        | 39           | 332         | Children with disabilities                                         | ICF-CY generic qualifier scale                                                 | NA                | D                            | Andrich Rating-Scale Model; Winsteps 3.74.0 |

SCI: Spinal cord injury

MOSES: Mobility, Self-Care, and Domestic Life

ICF-CY: International Classification of Functioning, Disability, and Health for Children and Youth core set

RUMM: Rasch Unidimensional Measurement Model

## Assigning Principle:

**A:** Less assistance with higher scores (Ascending Scoring Principle);

**D:** Descending Scoring Principle (Higher disability with higher scores)

ICF generic qualifier scale:

0 = 0–4% No problem,

1 = 5–24% Mild problem,

2 = 25–49% Moderate problem,

3 = 50–95% Severe problem,

4 = 96–100% Complete problem

8 = Not specified (used when there is insufficient information to quantify the extent of the problem)

9 = Not applicable (used to indicate when a category does not apply to a particular person)

ICF-CY generic qualifier scale:

1 = Child's ability is as expected for his or her age.

2 = Child has difficulties, but functioning is still in the expected range for his or her age.

3 = Child needs help from another person with functions, activities, and participation.

4 = Child needs help and care; the child has only limited ability with respect to body functions, activities, and participation.

5 = Child is totally dependent on others for body functions, activities, and participation.



**Table 2. Dense Stratification Principle and Less Items based on the ICF-based IRT Modeling**

| Author, year           | ICF Items                                                                | Candidate ICF Item | Item bank | Sample Size | Setting                                                                                                    | Response Options            | Collapse Strategy | Assigning Principle (A or D) | Software                |
|------------------------|--------------------------------------------------------------------------|--------------------|-----------|-------------|------------------------------------------------------------------------------------------------------------|-----------------------------|-------------------|------------------------------|-------------------------|
| Prodinge et al., 2012  | Brief ICF Core Set for fibromyalgia                                      | 19                 | 14        | 256         | Patients with Fibromyalgia                                                                                 | ICF generic qualifier scale | 01123             | D                            | RUMM 2020               |
| Reinhardt et al., 2016 | ICF Generic Set categories                                               | 7                  | 7         | 761         | Musculoskeletal, neurological health condition, SCI and TBI                                                |                             | NA                | D                            | RUMM 2030               |
| Illum and Gradel, 2017 | ICF-CY                                                                   | 26                 | 26        | 162         | Parents of children with disability                                                                        |                             | NA                | D                            | Winsteps 3.74.0         |
| Illum et al., 2018     | ICF-CY                                                                   | 26                 | 26        | 162         | Parents of children with disability                                                                        |                             | NA                | D                            | Winsteps 3.74.0         |
| Reinhardt et al., 2016 | ICF Generic Set categories                                               | 7                  | 7         | 761         | Musculoskeletal, Neurological health condition                                                             |                             | NA                | D                            | RUMM 2030               |
| Guo et al., 2020       | Activity and participation categories in the brief ICF core set for COPD | 4                  | 4         | 103         | Patients with COPD                                                                                         |                             | NA                | D                            | FACETS (Minifac) 3.67.0 |
| Alviar et al., 2012    | ICF core set for OA                                                      | 32                 | 25        | 316         | Adults with OA who were either waiting for hip or knee arthroplasty (pre-operative), or within one year of |                             | 01123             | D                            | RUMM 2030               |

|                        |                                                                                 |    |              |      |                                       |                                                                                                                                                                     |        |   |           |
|------------------------|---------------------------------------------------------------------------------|----|--------------|------|---------------------------------------|---------------------------------------------------------------------------------------------------------------------------------------------------------------------|--------|---|-----------|
|                        |                                                                                 |    |              |      | surgery (post-operative)              |                                                                                                                                                                     |        |   |           |
| Jia et al., 2020       | SCI-related ICF items                                                           | 31 | 28           | 112  | Families of SCI patients              |                                                                                                                                                                     | NA     | D | RUMM 2030 |
| Misajon et al., 2008   | Self-care, Mobility, Participation, Relationships, and Psychological Well-being | 23 | 23           | 210  | Mobility impairment                   | Impact scale: “no impact” to “extreme impact”, or Distress scale: “no distress” to “extreme distress”; 6-point scale (012345)                                       | 011223 | D | RUMM 2020 |
| Pallant et al., 2009   |                                                                                 | 23 | 22           | 259  | Patients with OA                      |                                                                                                                                                                     | NA     | D | RUMM 2020 |
| Prodinger et al., 2019 | Mobility, Selfcare, Domestic life                                               | 25 | Not reported | 2927 | Stroke, RA, OA                        | No problem to complete problem; 5-point scale (0-4)                                                                                                                 | NA     | D | RUMM 2030 |
| Janeslätt et al., 2015 | Time-Self rating ICF environmental factors                                      | 5  | 5            | 64   | Adults with/without mental disability | Not at all/a little/a lot/very much (1234)                                                                                                                          | NA     | A | Winsteps  |
| Prodinger et al., 2016 | SCIM-SR                                                                         | 17 | 17           | 1549 | Traumatic or nontraumatic SCI         | Total assistance/partial assistance/independent but need adaptive devices or specific equipment/ independent and do not need adaptive devices or specific equipment | NA     | A | RUMM 2030 |

SCIM-SR: Spinal Cord Independence Measure – Self Report; TBI: traumatic brain injury ; COPD: chronic obstructive pulmonary disease; RA: rheumatoid arthritis; OA: Osteoarthritis

**Table 3. Sparse Stratification Principle and Less Items based on the ICF-based IRT Modeling**

| Author, year          | ICF Items                                                                                                                                             | Candidate ICF Item | Item bank | Sample Size | Setting                     | Response Options                                                                                                                                                                                                                                                                        | Collapse Strategy      | Assigning Principle (A or D) | Software                   |
|-----------------------|-------------------------------------------------------------------------------------------------------------------------------------------------------|--------------------|-----------|-------------|-----------------------------|-----------------------------------------------------------------------------------------------------------------------------------------------------------------------------------------------------------------------------------------------------------------------------------------|------------------------|------------------------------|----------------------------|
| Ostir et al. 2006     | Home and Community Participation                                                                                                                      | 20                 | 20        | 594         | Inpatient rehabilitation    | Performance: “0 – Did not participate in this life situation”; “1 – Participated monthly (once every 3–4 weeks)”; “2 – Participated bi-weekly (once every 2 weeks)”; “3 – Participated weekly (1–4 days per week)”; and “4 – Participated daily/almost daily (5 or more days per week)” | 3-level scoring system | A                            | WINSTEPS                   |
| Pallant et al., 2006  | Mental functions, self-care, domestic life, mobility, interpersonal interactions & relationships, major life areas, community, social, and civic life | 23                 | 23        | 169         | Mobility impairment         | Impact scale: “no impact” to “extreme impact”, or Distress scale: “no distress” to “extreme distress”; 6-point scale (012345)                                                                                                                                                           | 011112                 | D                            | RUMM2020                   |
| Mukaiino et al., 2020 | home environment checklist                                                                                                                            | 10                 | 10        | 244         | Individuals with disability | Complete mismatch between the individual’s ability and home environment/Partial mismatch between the individual’s ability and home environment/No mismatch between the individual’s ability and home environment/no need for a specific environment; 3-point scale (210)                | NA                     | A                            | RUMM2030                   |
| Bagraith et al., 2017 | LBP Core Set Self-Report Checklist                                                                                                                    | 33                 | 27        | 308         | Adults with chronic LBP     | No difficulty/some difficulty/severe difficulty, could not do; 3-point scale (012)                                                                                                                                                                                                      | NA                     | D                            | Winsteps (v3.92) with JMLE |

| Author, year         | ICF Items                                   | Candidate ICF Item | Item bank                                                                      | Sample Size | Setting                                                | Response Options            | Collapse Strategy                                              | Assigning Principle (A or D) | Software               |
|----------------------|---------------------------------------------|--------------------|--------------------------------------------------------------------------------|-------------|--------------------------------------------------------|-----------------------------|----------------------------------------------------------------|------------------------------|------------------------|
| Gao et al., 2021     | Rehabilitation Set                          | 28                 | 28                                                                             | 515         | Subacute or chronic phase recovery                     | ICF generic qualifier scale | 01223 or 01112                                                 | D                            | RUMM2030               |
| Luo et al., 2022     | ICF-CY with CHD 1 year after surgery        | 23                 | 22                                                                             | 340         | Children aged 3–6 years after CHD surgery              |                             | 01122                                                          | A                            | Version 3.72.3 WINSEPS |
| Cieza et al., 2009   | ICF Core Set of OA                          | 38                 | 74 country-specific and 7 common ICF categories                                | 437         | OA from Germany, Italy, Hungary, Serbia, and Singapore |                             | 01233, 01222, 01123, 01111, 01122, 01123, 01233, 01222, 01112, | D                            | RUMM 2020              |
| Rauch et al., 2009   | Comprehensive ICF Core Sets for RA and AS   | 24                 | Not Reported                                                                   | 230         | Not Reported                                           |                             | environment: 1 and -1                                          | D                            | Conquest software      |
| Algurén et al., 2011 | Brief ICF Core Set for Stroke               | 15                 | 20 categories (6 country-common)                                               | 757         | China, Germany, Italy, and Sweden                      |                             | 01122                                                          | D                            | RUMM2030               |
| Yang et al., 2014    | Brief ICF core set for breast cancer        | 43                 | 30                                                                             | 158         | Routinely referred after breast cancer treatment       |                             | Environmental factors: 012                                     | D                            | WINSTEPS               |
| Bostan et al., 2014  | Activities and Participation ICF categories | 22                 | Capacity scale: 16 items; Performance scale: 18 items; Environmental: 13 items | 296         | CWP, LBP, OA, OP and RA                                |                             | 01122, environmental factors: -1 0 +1                          | D                            | RUMM2030               |
| Okochi et al., 2013  | Basic mobility, walking                     | 33                 | 8                                                                              | 4424        | Persons over 65 years old                              |                             | Person performed the task (1) or not (0).                      | NA                           | A                      |

LBP: low back pain; CHD: congenital heart disease

**Table 4 Sparse Stratification Principle and More Items based on the ICF-based IRT Modeling**

| Author, year          | ICF Items                                           | Candidate ICF Item | Item bank    | Sample Size | Setting                                      | Response Options                                                                | Collapse Strategy                                    | Assigning Principle (A or D) | Software       |
|-----------------------|-----------------------------------------------------|--------------------|--------------|-------------|----------------------------------------------|---------------------------------------------------------------------------------|------------------------------------------------------|------------------------------|----------------|
| Uhlig et al., 2007    | Comprehensive ICF Core Set for rheumatoid arthritis | 78                 | 73           | 25          | Outpatient RA                                | ICF generic qualifier scale                                                     | Qualifiers: 5 to 3, environmental factors: 9 to 3    | D                            | RUMM 2020      |
| Cieza et al., 2009    | AS related ICF item                                 | 68                 | 64           | 111         | Not Reported                                 | ICF generic qualifier scale                                                     | 01233                                                | D                            | RUMM2020       |
| Røe et al., 2009      | Comprehensive ICF Core Set for LBP                  | 78                 | 59           | 118         | Acute, subacute or chronic                   | ICF generic qualifier scale                                                     | 01123, 00123; environmental factors: 012             | D                            | RUMM 2020      |
| Hilfiker et al., 2009 | Comprehensive ICF Core Set for LBP                  | 78                 | Not Reported | 61          | Not Reported                                 | ICF generic qualifier scale or modified qualifier scale (0,1,8,9 or -1,0,1,8,9) | 01222, 01111, 01122, -1-1-1-101122                   | D                            | RUMM 2020      |
| Kurtaiş et al., 2011  | Comprehensive ICF core set for OA                   | 55                 | 44           | 100         | Outpatient knee and/or hip OA                | ICF generic qualifier scale                                                     | 01122, 01111                                         | D                            | RUMM2030       |
| Bostan et al., 2012   | LBP, breast cancer, and stroke ICF items            | 194                | Not Reported | 361         | Patients with LBP, breast cancer, and stroke | ICF generic qualifier scale                                                     | 01122                                                | D                            | RUMM2020       |
| Røe et al., 2013      | Comprehensive ICF Core Set for LBP                  | 78                 | Not Reported | 972         | Acute, subacute or chronic                   | ICF generic qualifier scale                                                     | 00001,01122,00012,01122,00123,0122,00011,01233,01223 | D                            | RUMM2020       |
| Ballert et al., 2014  | Brief ICF Core Sets for Spinal Cord                 | 64                 | Not Reported | 1048        | Early post-acute and long-term health care   | No problem or not applicable (0), problem (1)                                   | NA                                                   | D                            | ConQuest and R |
| Kiltz et al., 2015    | Comprehensive ICF Core Set for AS                   | 251                | 17           | 1752        | Not Reported                                 | Dichotomous item                                                                | NA                                                   | D                            | RUMM 2030      |
| Li et al., 2016       | ICF-SCIN                                            | 65                 | 61           | 140         | Not Reported                                 | ICF generic qualifier scale                                                     | 01112                                                | D                            | RUMM 2030      |

|                           |                                                              |     |                                                                            |      |                               |                                                                                                           |            |   |                                     |
|---------------------------|--------------------------------------------------------------|-----|----------------------------------------------------------------------------|------|-------------------------------|-----------------------------------------------------------------------------------------------------------|------------|---|-------------------------------------|
| Müller M, et al., 2016    | PaArticular Scales                                           | 105 | 24 items for the Activities scale and 11 items for the Participation scale | 191  | Individuals in geriatric care | 0 for “no problem”, 1 for “mild to moderate problem”, 2 for “severe problem” and 3 for “complete problem” | 0112, 0111 | D | R 2.15.2                            |
| Feng et al., 2022         | 118 stroke-related ICF items (59 items in b and d domains)   | 118 | 45                                                                         | 130  | Inpatient stroke              | ICF generic qualifier scale; Functioning/disability (1/0)                                                 | 11000      | A | R (mokken and ltm package)          |
| Feng et al., 2022         | 31 haemophilic-specific activity and participation ICF items | 112 | 31                                                                         | 70   | Haemophiliacs                 |                                                                                                           | 10000      | A | R 4.1.0 (mokken and mirt package)   |
| Jiang et al., 2023        | 34 items in b domain and 58 items in d domain                | 92  | 67                                                                         | 150  | Children with CP              |                                                                                                           | 10000      | A | R (mokken and ltm package)          |
| Oude Voshaar et al., 2017 | ICF domestic life chapter                                    | 72  | 41                                                                         | 1128 | Outpatient populations        | 3-point                                                                                                   | NA         | A | Mokken R-package, Rasch model (PCM) |

RA: rheumatoid arthritis; ICF-SCIN: ICF set for spinal cord injury nursing; CP: cerebral palsy
